# Supplementary material for: Cationic surface modification of gold nanoparticles for enhanced cellular uptake and X-ray radiation therapy
Source: Royal Society of Chemistry journal article supplement (doi:10.1039/c5tb00766f), 2015-01-01
Supplement: c5tb00766f1.pdf [file c5tb00766f1.pdf]

Submitted to *Journal of Materials Chemistry B*

*Supplementary Information*

**Cationic surface modification of gold nanoparticles for enhanced cellular uptake and X-ray radiation therapy**

*Chaoming Wang<sup>bcd</sup>, An Sun<sup>d</sup>, Yong Qiao<sup>cd</sup>, Peipei Zhang<sup>c</sup>, Liyuan Ma<sup>acd</sup> and Ming Su<sup>acd\*</sup>*

<sup>a</sup> *Department of Chemical Engineering, Northeastern University, Boston, MA, USA 02115,*

*Tel: +1-617-3736219; E-mail:m.su@neu.edu*

<sup>b</sup> *Applied Mechanics and Structure Safety Key Laboratory of Sichuan Province, School of Mechanics and*

*Engineering, Southwest Jiaotong University, Chengdu, Sichuan, China 610030*

<sup>c</sup> *Department of Biomedical Engineering, Worcester Polytechnic Institute, Worcester, MA, USA 01609*

<sup>d</sup> *NanoScience Technology Center, Biomolecular Technology Center, University of Central Florida, Orlando,*

*FL, USA 32826*

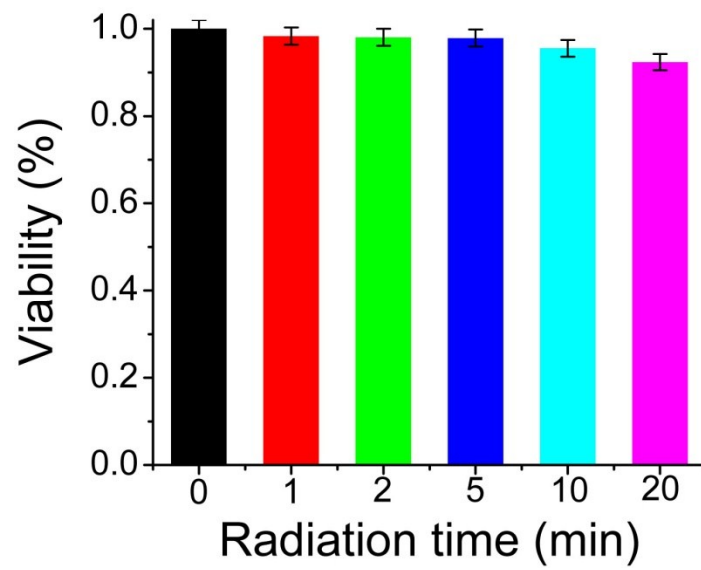

Fig. S1: Viability of HeLa cells after X-ray irradiation for 1, 2, 5, 10 and 20min and measured by Calcein AM/EthD-1 assay.
